# Supplementary material for: INDETERMINATE-DOMAIN 4 (IDD4) coordinates immune responses with plant-growth in Arabidopsis thaliana
Source: PLOS journal article supplement (doi:10.1371/journal.ppat.1007499), 2019-01-24
Supplement: S3 (10.1371/journal.ppat.1007499.s003) [file journal.ppat.1007499.s003]

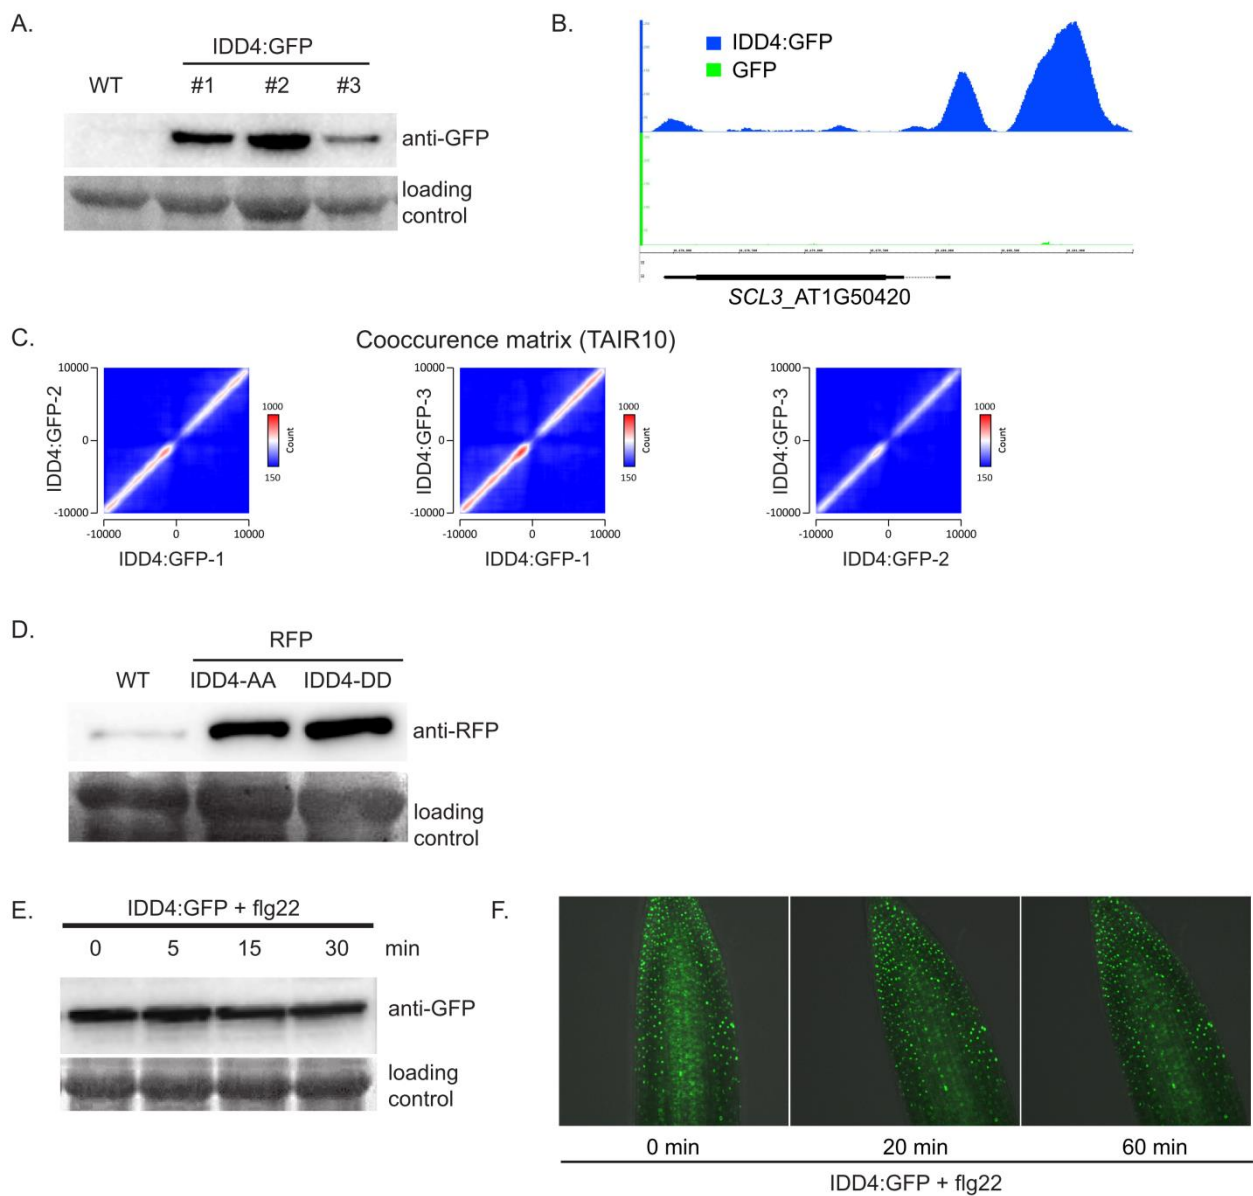

### S3 Fig. IDD4 protein stability is not affected by flg22 perception

**(A)** GFP-antibody binding to GFP fusion protein of stable transgenic *IDD4:GFP Arabidopsis* lines used for ChIP-SEQ and ChIP-qPCR approach. Protein loading 30µg.

**(B)** Binding profile of IDD4 for the *SCL3* locus. The TAIR annotation of the genomic locus is shown at the bottom of each panel. The genomic locus is in reverse orientation (-). The enrichment was found to be in the upstream region of the respective genomic locus (see also **Table S3**).

**(C)** Co-occurrence matrix illustrates overlapping of IDD4 binding to the same target sequences in the independent biological replicates.

**(D)** Evaluation of *IDD4-AA:RFP* and *IDD4-DD:RFP* protein amount in stable transgenic *Arabidopsis* lines proven by RFP-antibody. Protein loading 30µg.

**(E-F)** IDD4 protein stability is not affected after flg22 treatment as shown by Western-Blot analysis **(E)** and fluorescence microscopy **(F)** of 10 day-old seedlings of stable transgenic lines.
